# Supplementary material for: Potential Regional Air Quality Impacts of Cannabis Cultivation Facilities in Denver, Colorado
Source: Copernicus journal article supplement (doi:10.5194/acp-2019-479), 2019-06-03
Supplement: Supplementary file 1 [file acp-2019-479-supplement.pdf]

## Supplementary Material for the ACP manuscript “Potential Regional Air Quality Impacts of Cannabis Cultivation Facilities in Denver, Colorado”

Chi-Tsan Wang<sup>1</sup>, Christine Wiedinmyer<sup>2</sup>, Kirsti Ashworth<sup>3</sup>, Peter C Harley<sup>4</sup>, John Ortega<sup>5</sup>, Quazi Z. Rasool<sup>1</sup>, William Vizquete<sup>1\*</sup>

<sup>1</sup>Department of Environmental Sciences & Engineering, University of North Carolina, Chapel Hill, NC, USA

<sup>2</sup>Cooperative Institute for Research in Environmental Sciences, University of Colorado Boulder, Boulder, CO, USA

<sup>3</sup>Lancaster Environment Centre, Lancaster University, UK

<sup>4</sup>Denver, Colorado

<sup>5</sup>University of California Irvine, CA, USA

\*Corresponding author: e-mail: vizquete@unc.edu; Telephone: +1 919-966-0693; Fax: +1 919-966-7911

**Table S1.** The estimated plant count (*PC*) per cannabis cultivation facility (CCF) in Denver County and outside of Denver.

| Scenario name | PC per CCF         |               |                       |               |
|---------------|--------------------|---------------|-----------------------|---------------|
|               | Denver County      |               | outside Denver County |               |
|               | Recreational (233) | Medical (375) | Recreational (500)    | Medical (364) |
| 1_EC - 5_DPW  | 905                | 905           | 521                   | 521           |
| 6_PC          | 1,810              | 1,810         | 1,042                 | 1,042         |
| 7_PC          | 1,800              | 3,600         | 1,800                 | 3,600         |
| 8_MAX         | 1,800              | 3,600         | 1,800                 | 3,600         |

**Table S2.** License tiers issued by Colorado Department of Revenue (DOR) and the maximum allowed plant count (PC) for recreational and medical cannabis cultivation facility (CCF).

| Tier | Recreational CCF | Medical CCF |
|------|------------------|-------------|
| 1    | 1,800            | 3,600       |
| 2    | 3,600            | 6,000       |
| 3    | 6,000            | 10,200      |
| 4    | 10,200           |             |
| 5    | 13,800           |             |

**Table S3.** All data summed from July 18<sup>th</sup>, 6 AM LST to, 2 PM LST for grid cells and layers shown in Fig. S6. The base case (BC) scenario column shows the absolute predicted values and the subsequent columns the predicted changes due to emissions from the 3\_EC scenario. Percentages in parenthesis are the changes in 3\_EC relative to BC. Shown are the **(A)** total amount of VOC and TERP consumed due to oxidation (ppb), the **(B)** total amount of hydroxyl radical (OH) and total peroxy radicals (TRO<sub>2</sub>) that were generated and their sources (ppb), and the **(C)** total amount of Nitrogen Dioxide (NO<sub>2</sub>) and NO<sub>x</sub> termination products (NO<sub>z</sub>) produced and their sources (ppb).

A

|                        | BC   | 3_EC          |
|------------------------|------|---------------|
| VOC + OH               | 22.3 | 22.6 (+1.26%) |
| TERP + OH              | 0.12 | 0.24 (+100%)  |
| VOC + NO <sub>3</sub>  | 0.03 | 0.04 (+33.3%) |
| TERP + NO <sub>3</sub> | 0.01 | 0.03 (+200%)  |
| VOC + O <sub>3</sub>   | 0.95 | 1.01 (+6.32%) |
| TERP + O <sub>3</sub>  | 0.05 | 0.12 (+140%)  |

B

|                                               | BC   | 3_EC          |
|-----------------------------------------------|------|---------------|
| OH generation                                 | 18.2 | 18.3 (+0.60%) |
| from O1D + H2O                                | 7.68 | 7.69 (+0.13%) |
| from ALD photolysis                           | 10.5 | 10.6 (+0.95%) |
| Peroxy radical (TRO <sub>2</sub> ) generation | 105  | 107 (+2%)     |
| from VOC initial reactions                    | 31.0 | 31.4 (+1.29%) |
| from TERP initial reactions                   | 0.22 | 0.47 (+114%)  |

C

|                             | BC    | 3_EC           |
|-----------------------------|-------|----------------|
| NO to NO <sub>2</sub>       | 3,121 | 3,118 (-0.10%) |
| NO + O <sub>3</sub>         | 3,020 | 3,016 (-0.13%) |
| NO + TRO <sub>2</sub>       | 63.4  | 64.0 (+0.93%)  |
| NO <sub>z</sub> generation  | 22.0  | 22.2 (+1.00%)  |
| NTR generation              | 1.33  | 1.40 (+5.26%)  |
| PAN generation              | 5.21  | 5.25 (+0.77%)  |
| PANX generation             | 1.74  | 1.79 (+2.87%)  |
| HNO <sub>3</sub> generation | 13.7  | 13.8 (+0.51%)  |

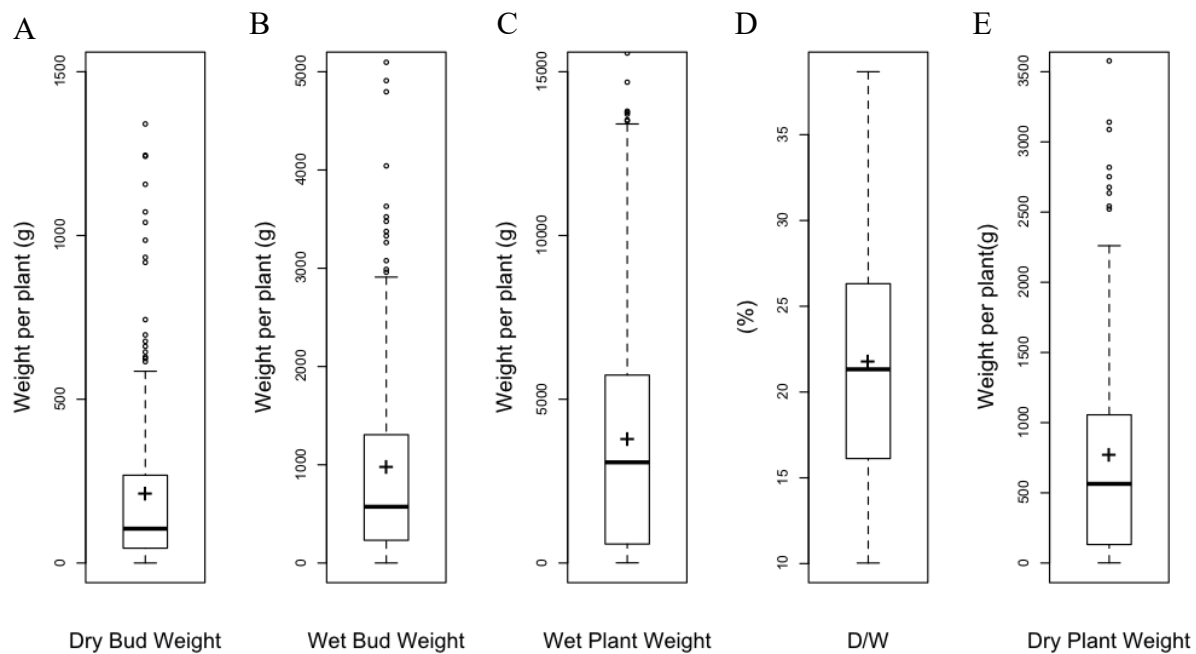

**Figure S1.** From cannabis cultivation facilities a box and whisker plot of the reported ( $N = 18,257$ ) (A) dry bud weight, (B) wet bud weight, and (C) wet plant weight from the Liquor and Cannabis Board (LCB) database maintained by the state of Washington for August-October 2017. Also shown is the (D) estimated ratio of dry bud to wet bud weight (D/W) per plant and the (E) dry plant weight calculated by multiplying D/W ratio and the wet plant weight. The black cross in each box indicates the average.

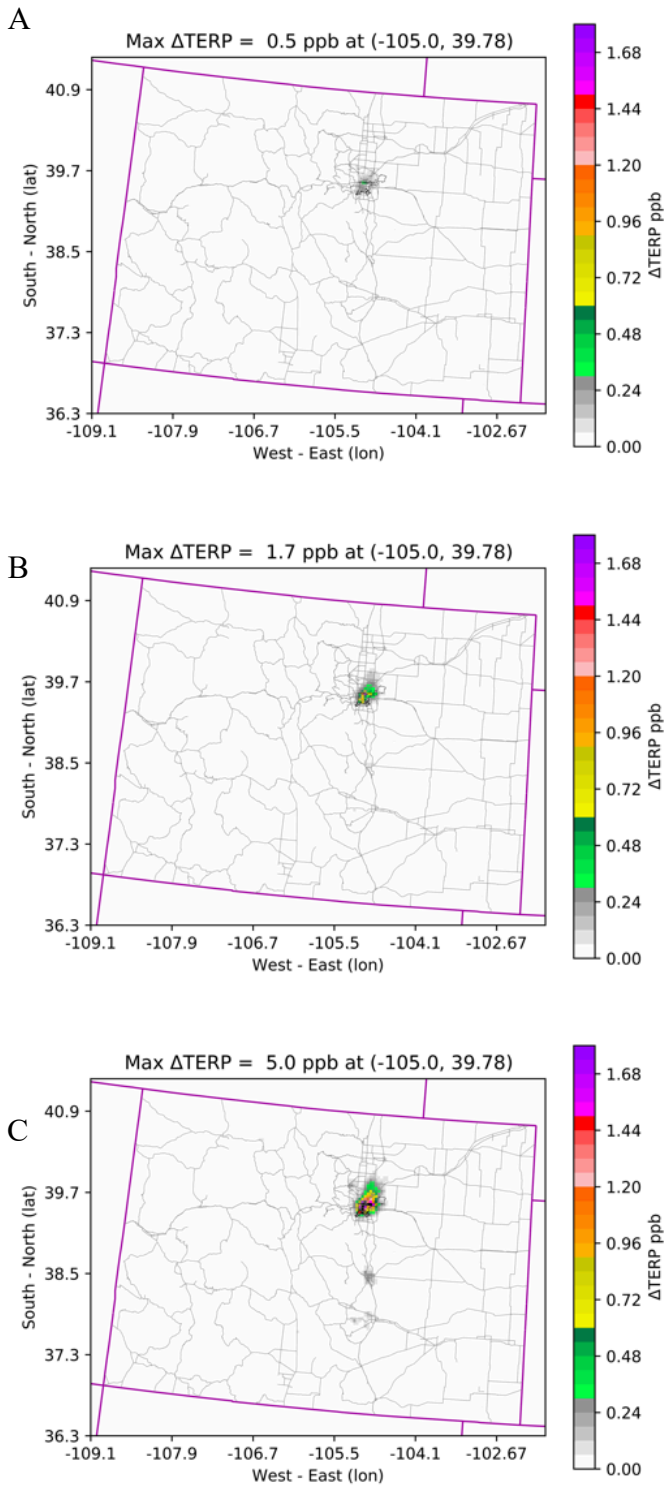

**Figure S2.** The maximum hourly change in predicted TERP concentrations (ppbv) across the 4 km  $\times$  4 km domain over the entire 90 days simulation for the (A) 1\_EC, (B) 5\_DPW, and (C) 3\_EC scenarios.

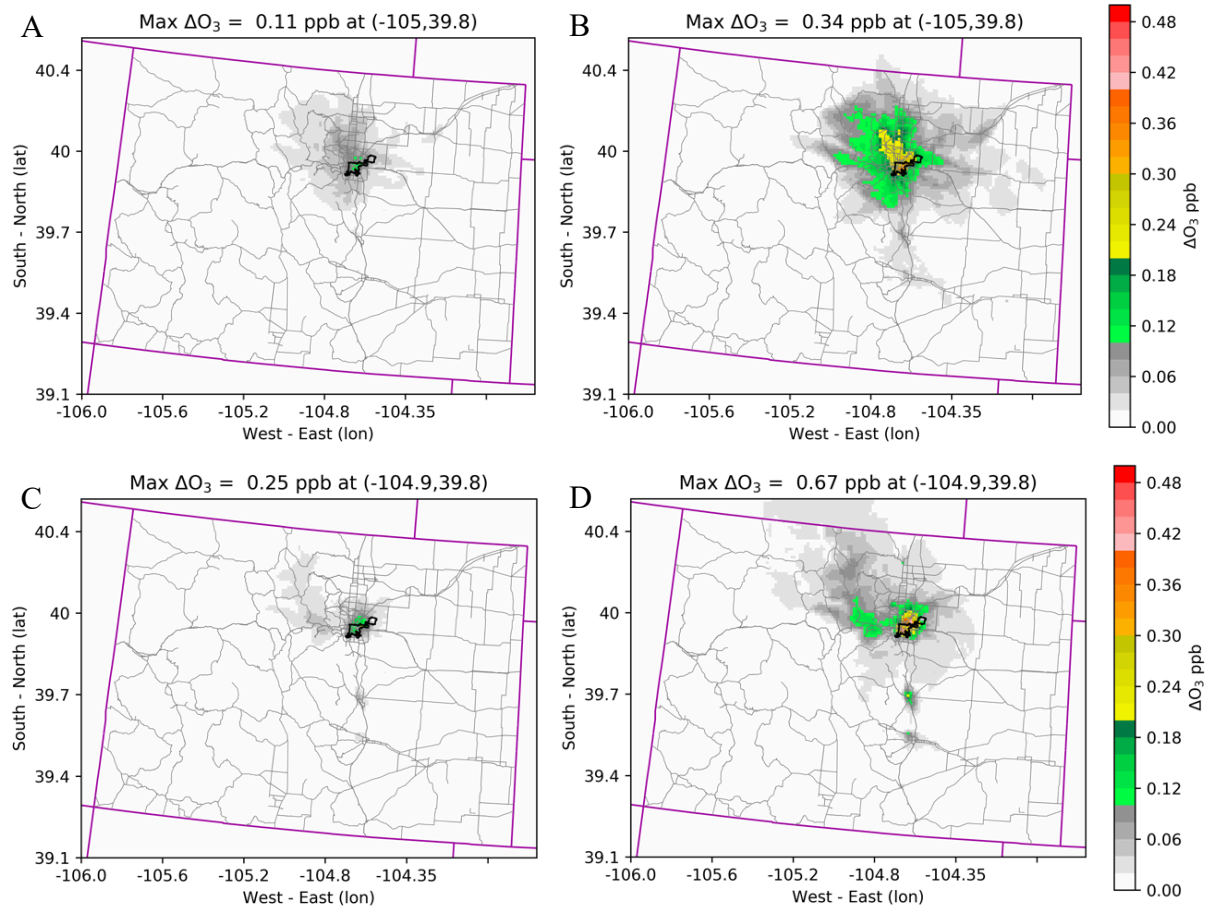

**Figure S3.** The predicted changes in hourly ozone concentrations for the 4 km  $\times$  4 km domain during the daytime (6 AM – 6 PM LST) for all 90 days of the simulation for the (A) 5\_DPW, (B) 3\_EC scenarios. The nighttime (6 PM – 6 AM LST) results are for the (C) 5\_DPW, (D) 3\_EC scenarios. Black regions within each map indicate changes in ozone concentration greater than 0.28 ppb. The grey lines indicate major highways and black lines outline Denver County.

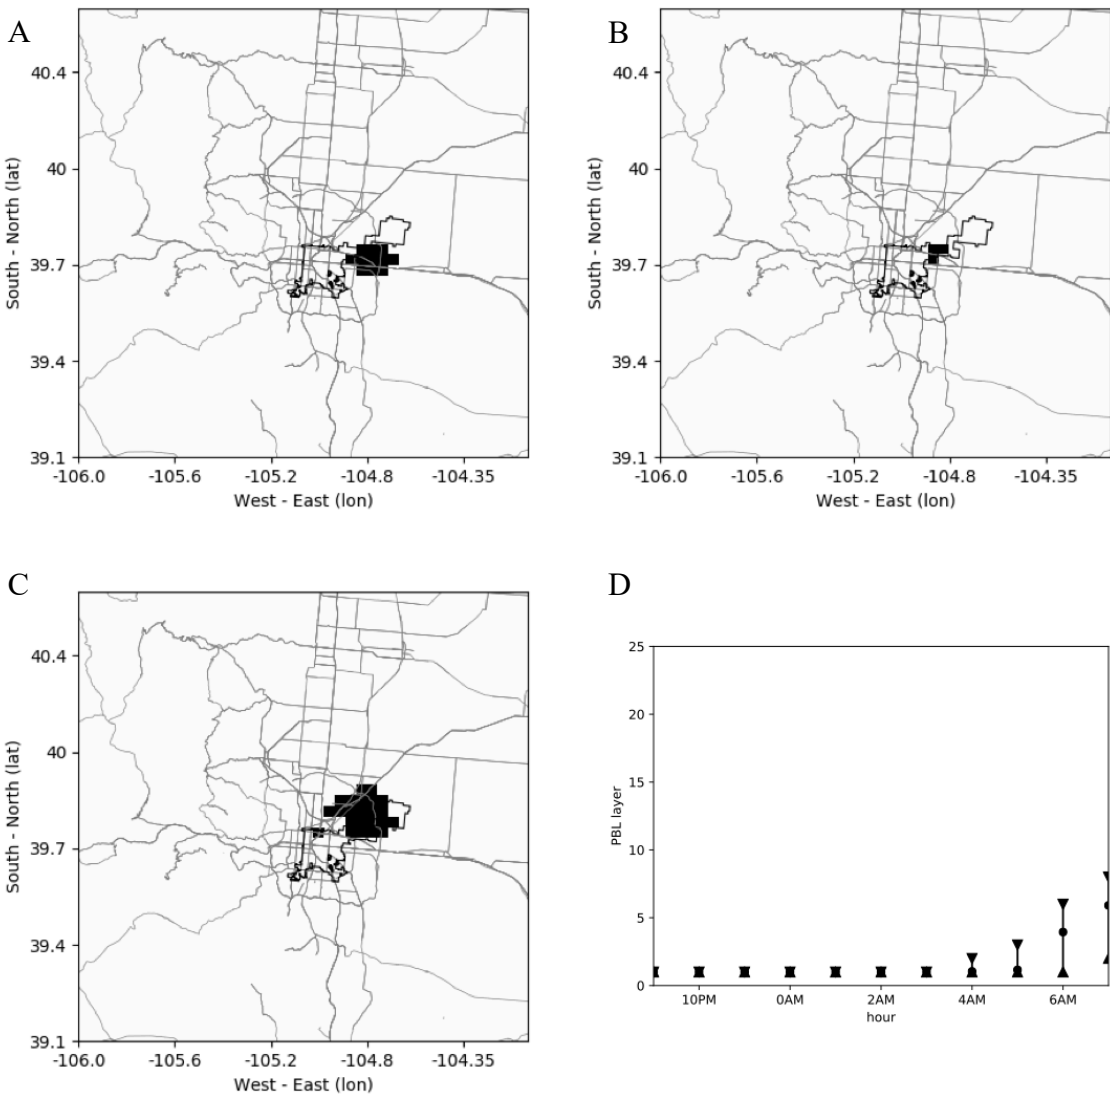

**Figure S4.** The snapshots of the horizontal grid cells that were chosen for process analysis is shown (A) July 27<sup>th</sup>, 9 PM LST, and July 28<sup>th</sup> at (B) 0 AM LST (i.e. midnight), (C) 3 AM LST. Also shown are the (D) vertical grid layers that were aggregated during the entire analysis period; the black circle is the average PBL height in the chosen horizontal grid cells.

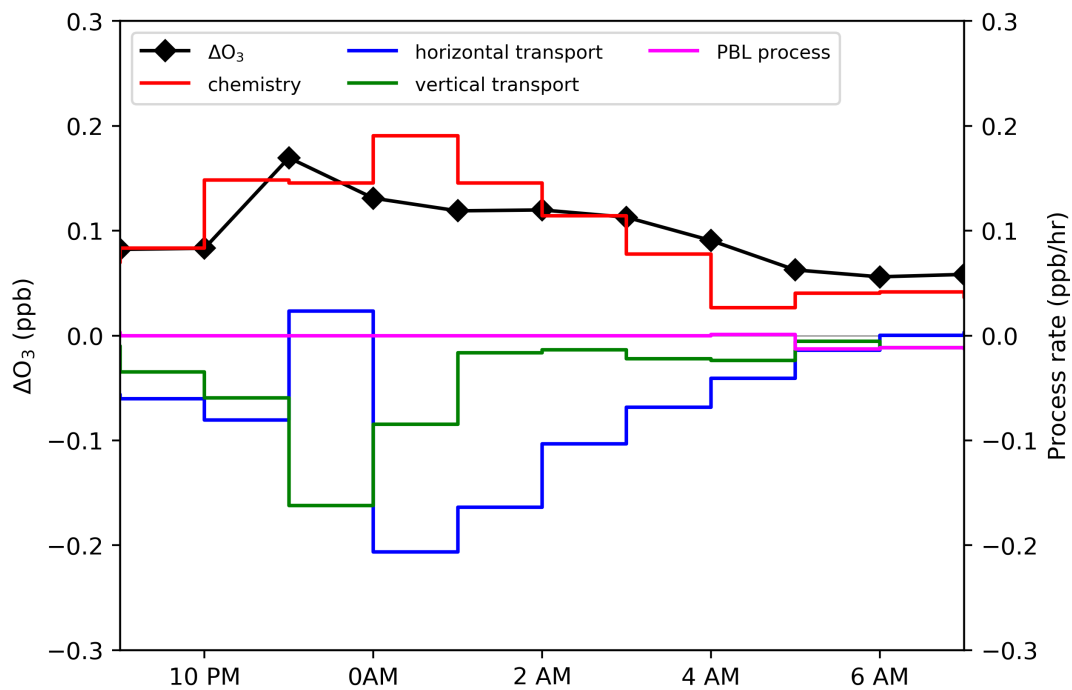

**Figure S5.** The changes using scenario 3\_EC minus BC in chemical and physical processes that impact ozone. The hourly changes in ozone concentrations (ppb) are shown in black diamonds with changes in rates (ppb/hr) due to chemistry (red), horizontal transport (blue), vertical transport (green), and planet boundary layer (PBL) change process (magenta).



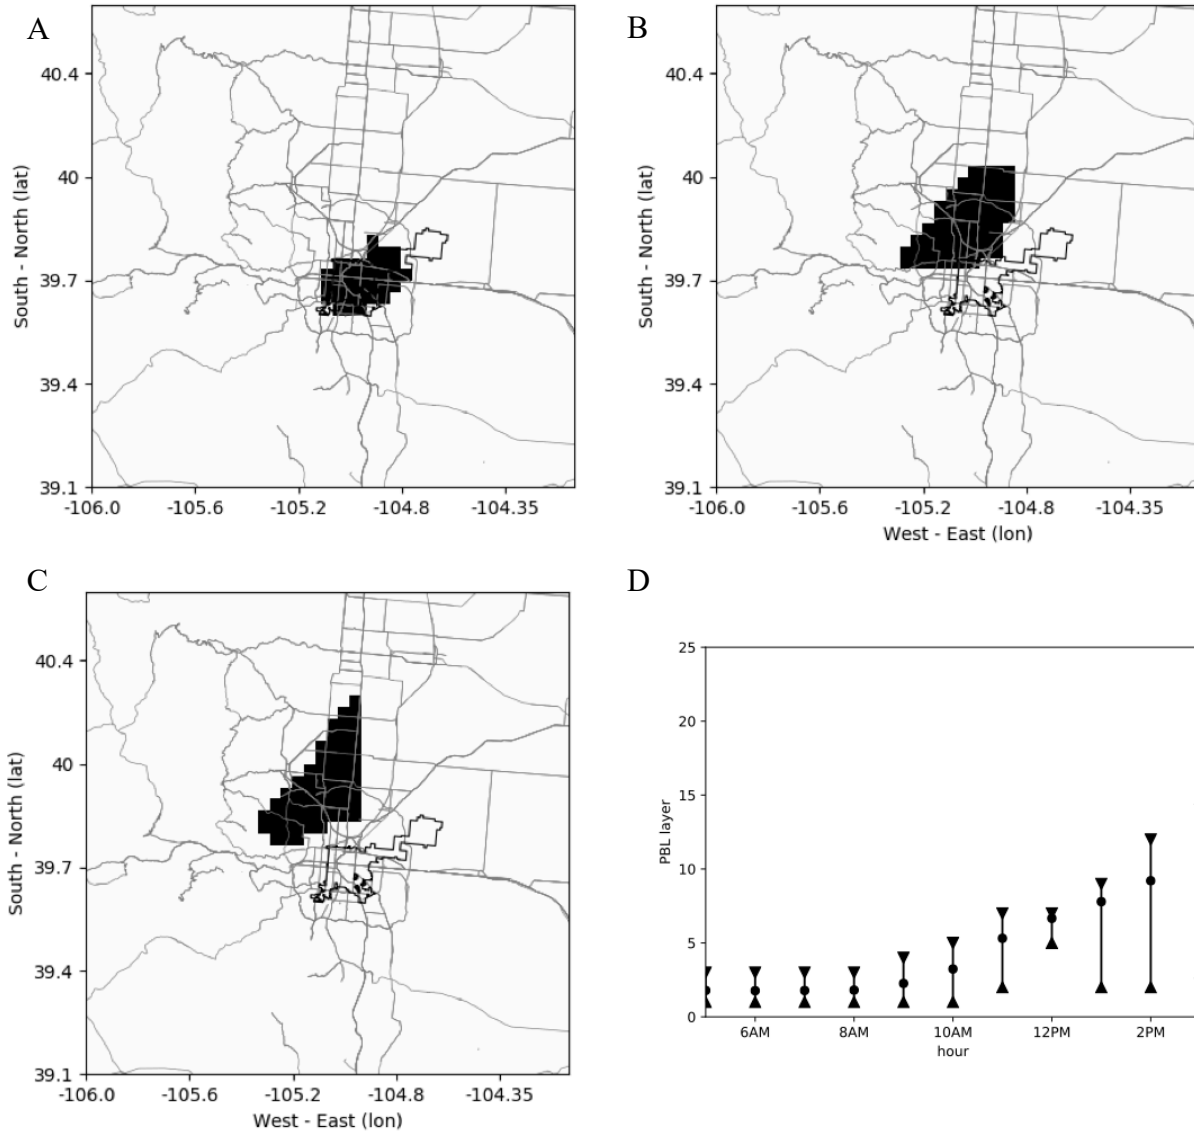

**Figure S6.** The snapshots of the horizontal grid cells that were chosen for process analysis is shown July 18<sup>th</sup> at **(A)** 9 AM LST, **(B)** 12 PM LST (i.e. noon), **(C)** 2 PM LST. Also shown are the **(D)** vertical grid layers that were aggregated during the entire analysis period; the black circle is the average PBL height in the chosen horizontal grid cells.

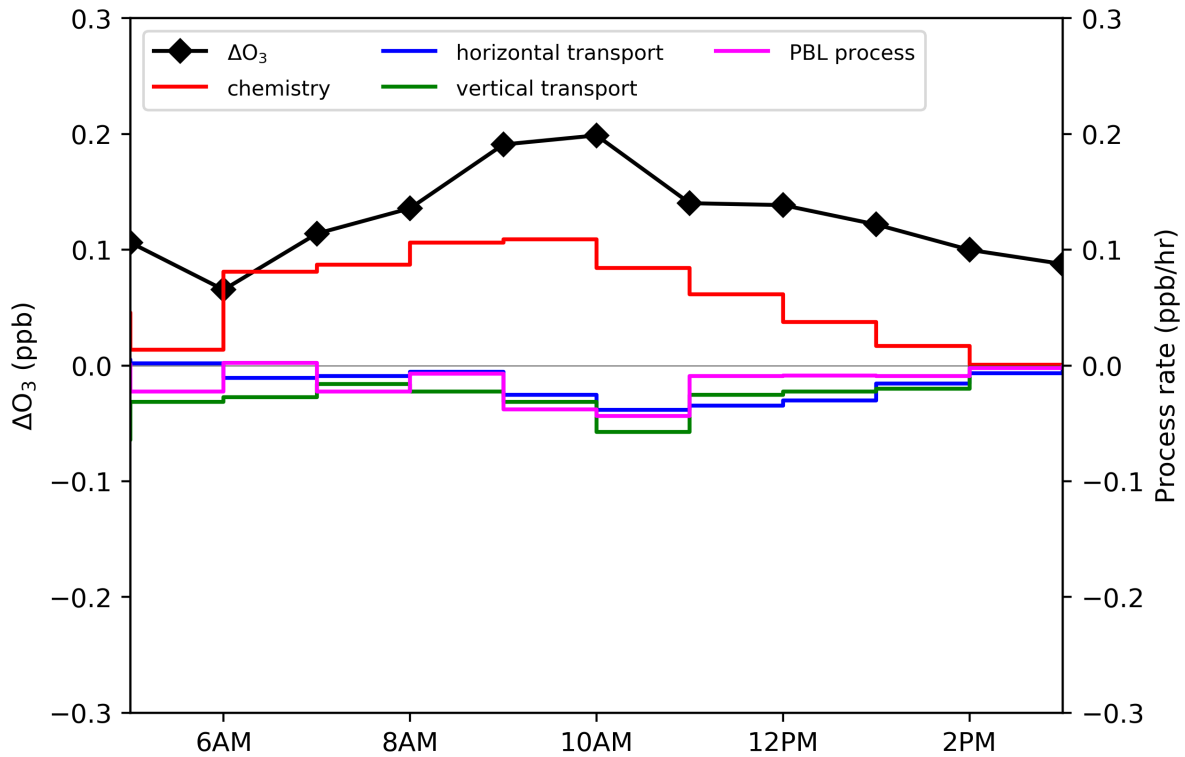

**Figure S7.** The changes using scenario 3\_EC minus BC in chemical and physical processes that impact ozone. The hourly changes in ozone concentrations (ppb) are shown in black diamonds with changes in rates (ppb/hr) due to chemistry (red), horizontal transport (blue), vertical transport (green), and planet boundary layer (PBL) change process (magenta).
